# Supplementary material for: Association of Seizure with COVID-19 Vaccines in Persons with Epilepsy: A Systematic Review and Meta-analysis
Source: bioRxiv or medRxiv preprint supplement (doi:10.1101/2023.05.06.23289604), 2023-05-08

Supplementary materials

## **Association of Seizure with COVID-19 Vaccines in Persons with Epilepsy: A Systematic Review and Meta-analysis**

Ali Rafati<sup>1,2†</sup>, M.D., M.P.H.; Melika Jameie<sup>3,4†</sup>, M.D.; Mobina Amanollahi<sup>4</sup>, M.D.; Mana Jameie<sup>5</sup>, M.D., M.P.H.; Yeganeh Pasebani<sup>1,2</sup>, M.D.; Delaram Sakhaei<sup>6</sup>, M.D.; Saba Ilkhani<sup>7</sup>, M.D., M.P.H.; Sina Rashedi<sup>2,8</sup>, MD, M.P.H.; Mohammad Yazdan Pasebani<sup>9</sup>; Mohammadreza Azadi<sup>1</sup>, M.D.; Mehran Rahimlou<sup>10</sup>, Ph.D.; Churl-Su Kwon<sup>11\*</sup>, M.D., M.P.H., FRSPH.

1. School of Medicine, Iran University of Medical Sciences, Tehran, Iran.
2. Rajaie Cardiovascular Medical and Research Center, Iran University of Medical Sciences, Tehran, Iran
3. Neuroscience Research Center, Iran University of Medical Sciences, Tehran, Iran.
4. Iranian Center of Neurological Research, Neuroscience Institute, Tehran University of Medical Sciences, Tehran, Iran.
5. Cardiovascular Diseases Research Institute, Tehran Heart Center, Tehran University of Medical Sciences, Tehran, Iran.
6. School of Medicine, Sari branch, Islamic Azad University, Sari, Iran.
7. Center for Surgery and Public Health, Brigham and Women's Hospital, Harvard Medical School, Boston, MA, USA.
8. Non-communicable Diseases Research Center, Endocrinology and Metabolism Population Sciences Institute, Tehran University of Medical Sciences, Tehran, Iran.
9. Islamic Azad University East Tehran Branch, Tehran, Iran.
10. Department of Nutrition, School of Medicine, Zanjan University of Medical Sciences, Zanjan, Iran.
11. Columbia University, Departments of Neurology, Epidemiology, Neurosurgery and the Gertrude H. Sergievsky Center, New York, NY, USA.

### **\*Corresponding author:**

Churl-Su Kwon M.D., M.P.H., FRSPH.  
622 West 168th Street, PH19-106  
New York, NY 10032  
(T) 212-305-4966  
(E) ck3112@cumc.columbia.edu

† These two authors contributed equally.

## Table of Contents

|                                                                                                                                                     |           |
|-----------------------------------------------------------------------------------------------------------------------------------------------------|-----------|
| <b>Table S1- Systematic search syntax for databases with results as of January 31, 2023. ....</b>                                                   | <b>3</b>  |
| <b>Table S2- Quality assessment of the cohorts using the Newcastle-Ottawa scale (NOS) modified for cohort studies.....</b>                          | <b>5</b>  |
| <b>Table S3- Quality assessment of the cross-sectional studies using the Newcastle-Ottawa scale (NOS) modified for cross-sectional studies.....</b> | <b>6</b>  |
| <b>Figure S1- PRISMA flow diagram of the systematic search.....</b>                                                                                 | <b>7</b>  |
| <b>Figure S2- Funnel plot for studies reporting increased seizure frequency after COVID-19 vaccines. ....</b>                                       | <b>8</b>  |
| <b>Figure S3- Funnel plot for studies comparing mRNA vs. viral-vector COVID-19 vaccines regarding increased seizure frequency. ....</b>             | <b>9</b>  |
| <b>Figure S4- Funnel plot for studies reporting status epilepticus incidence proportion after COVID-19 vaccines.....</b>                            | <b>10</b> |

**Table S1- Systematic search syntax for databases with results as of January 31, 2023.**

| MEDLINE (via PubMed) |                                                                                                                                                                                                                                                                                                                                                                                                                                                                                                                                                                                                                                                                                                                                                                                                                                                                                                                                                                                                                                                                                                                                                                                                                                                                                                                                                                                                                                                                                                                                                                                                                                                                                                                                                                                                                                                                                                                                                                                                                                                                                                                                                                                                                                                                                                                                                                                                                                                                                                                                                                                                                                                                                                                                                                                                                                                                                                                                                                                                                                                                                                                                                                                                                                                                                                                                                                                                                                                                                          |                |
|----------------------|------------------------------------------------------------------------------------------------------------------------------------------------------------------------------------------------------------------------------------------------------------------------------------------------------------------------------------------------------------------------------------------------------------------------------------------------------------------------------------------------------------------------------------------------------------------------------------------------------------------------------------------------------------------------------------------------------------------------------------------------------------------------------------------------------------------------------------------------------------------------------------------------------------------------------------------------------------------------------------------------------------------------------------------------------------------------------------------------------------------------------------------------------------------------------------------------------------------------------------------------------------------------------------------------------------------------------------------------------------------------------------------------------------------------------------------------------------------------------------------------------------------------------------------------------------------------------------------------------------------------------------------------------------------------------------------------------------------------------------------------------------------------------------------------------------------------------------------------------------------------------------------------------------------------------------------------------------------------------------------------------------------------------------------------------------------------------------------------------------------------------------------------------------------------------------------------------------------------------------------------------------------------------------------------------------------------------------------------------------------------------------------------------------------------------------------------------------------------------------------------------------------------------------------------------------------------------------------------------------------------------------------------------------------------------------------------------------------------------------------------------------------------------------------------------------------------------------------------------------------------------------------------------------------------------------------------------------------------------------------------------------------------------------------------------------------------------------------------------------------------------------------------------------------------------------------------------------------------------------------------------------------------------------------------------------------------------------------------------------------------------------------------------------------------------------------------------------------------------------------|----------------|
| No.                  | Syntax                                                                                                                                                                                                                                                                                                                                                                                                                                                                                                                                                                                                                                                                                                                                                                                                                                                                                                                                                                                                                                                                                                                                                                                                                                                                                                                                                                                                                                                                                                                                                                                                                                                                                                                                                                                                                                                                                                                                                                                                                                                                                                                                                                                                                                                                                                                                                                                                                                                                                                                                                                                                                                                                                                                                                                                                                                                                                                                                                                                                                                                                                                                                                                                                                                                                                                                                                                                                                                                                                   | No. of results |
| 1.                   | ("COVID-19"[Title/Abstract] OR "sars cov 2"[Title/Abstract] OR "covid 19 vaccines"[Title/Abstract] OR "covid 19 vaccines"[MeSH Terms] OR "covid 19 vaccine*"[Title/Abstract] OR "sars cov 2 vaccine*"[Title/Abstract] OR "sars cov 2 vaccine*"[Title/Abstract] OR "vaccines sars cov 2"[Title/Abstract])                                                                                                                                                                                                                                                                                                                                                                                                                                                                                                                                                                                                                                                                                                                                                                                                                                                                                                                                                                                                                                                                                                                                                                                                                                                                                                                                                                                                                                                                                                                                                                                                                                                                                                                                                                                                                                                                                                                                                                                                                                                                                                                                                                                                                                                                                                                                                                                                                                                                                                                                                                                                                                                                                                                                                                                                                                                                                                                                                                                                                                                                                                                                                                                 | 301,347        |
| 2.                   | "Seizures"[MeSH Terms] OR "seizure*"[Title/Abstract] OR "single seizure*"[Title/Abstract] OR "seizure single"[Title/Abstract] OR "seizures somatosensory"[Title/Abstract] OR "seizure somatosensory"[Title/Abstract] OR "somatosensory seizure*"[Title/Abstract] OR "vertiginous seizure*"[Title/Abstract] OR "seizures vestibular"[Title/Abstract] OR "vestibular seizure*"[Title/Abstract] OR "seizures visual"[Title/Abstract] OR "seizure visual"[Title/Abstract] OR "visual seizure*"[Title/Abstract] OR "nonepileptic seizure*"[Title/Abstract] OR "seizures nonepileptic"[Title/Abstract] OR "non epileptic seizure*"[Title/Abstract] OR "non epileptic seizure*"[Title/Abstract] OR "seizure non epileptic"[Title/Abstract] OR "generalized absence seizure*"[Title/Abstract] OR "absence seizures generalized"[Title/Abstract] OR "tonic clonic seizure*"[Title/Abstract] OR "seizure tonic clonic"[Title/Abstract] OR "Tonic Clonic Seizure"[Title/Abstract] OR "clonic seizures tonic"[Title/Abstract] OR "seizure tonic clonic"[Title/Abstract] OR "Tonic Clonic Seizures"[Title/Abstract] OR "seizures tonic clonic"[Title/Abstract] OR "generalized tonic clonic seizure*"[Title/Abstract] OR "generalized tonic clonic seizure*"[Title/Abstract] OR "seizure generalized tonic clonic"[Title/Abstract] OR "seizures generalized tonic clonic"[Title/Abstract] OR "tonic clonic seizures generalized"[Title/Abstract] OR "clonic seizure*"[Title/Abstract] OR "seizure clonic"[Title/Abstract] OR "seizures clonic"[Title/Abstract] OR "tonic seizure*"[Title/Abstract] OR "seizure tonic"[Title/Abstract] OR "seizures tonic"[Title/Abstract] OR "convulsions non epileptic"[Title/Abstract] OR "non epileptic convulsion*"[Title/Abstract] OR "convulsion*"[Title/Abstract] OR "atonic absence seizure*"[Title/Abstract] OR "absence seizure atonic"[Title/Abstract] OR "absence seizures atonic"[Title/Abstract] OR "seizure convulsive*"[Title/Abstract] OR "convulsive seizure*"[Title/Abstract] OR "seizures convulsive"[Title/Abstract] OR "seizures motor"[Title/Abstract] OR "motor seizure*"[Title/Abstract] OR "seizure motor"[Title/Abstract] OR "jacksonian seizure*"[Title/Abstract] OR "seizure jacksonian"[Title/Abstract] OR "seizures auditory"[Title/Abstract] OR "auditory seizure*"[Title/Abstract] OR "seizure auditory"[Title/Abstract] OR "seizures focal"[Title/Abstract] OR "focal seizure*"[Title/Abstract] OR "seizure focal"[Title/Abstract] OR "partial seizure*"[Title/Abstract] OR "seizure partial"[Title/Abstract] OR "seizures generalized"[Title/Abstract] OR "generalized seizure*"[Title/Abstract] OR "seizure generalized"[Title/Abstract] OR "gustatory seizure*"[Title/Abstract] OR "seizures olfactory"[Title/Abstract] OR "olfactory seizure*"[Title/Abstract] OR "myoclonic seizure*"[Title/Abstract] OR "seizure myoclonic"[Title/Abstract] OR "epileptic seizure*"[Title/Abstract] OR "seizure epileptic"[Title/Abstract] OR "seizures epileptic"[Title/Abstract] OR "seizures sensory"[Title/Abstract] OR "seizure sensory"[Title/Abstract] OR "sensory seizure*"[Title/Abstract] OR "absence seizure*"[Title/Abstract] OR "seizure absence"[Title/Abstract] OR "complex partial seizure*"[Title/Abstract] OR "partial seizure complex"[Title/Abstract] OR "partial seizures complex"[Title/Abstract] OR "seizure complex partial"[Title/Abstract] OR "atonic seizure*"[Title/Abstract] OR "seizure atonic"[Title/Abstract] | 171,994        |
| 3.                   | #1 AND #2                                                                                                                                                                                                                                                                                                                                                                                                                                                                                                                                                                                                                                                                                                                                                                                                                                                                                                                                                                                                                                                                                                                                                                                                                                                                                                                                                                                                                                                                                                                                                                                                                                                                                                                                                                                                                                                                                                                                                                                                                                                                                                                                                                                                                                                                                                                                                                                                                                                                                                                                                                                                                                                                                                                                                                                                                                                                                                                                                                                                                                                                                                                                                                                                                                                                                                                                                                                                                                                                                | 946            |

| Web of Science |                                                                                                                                                                                                                                                                                                                                                                                                                                                                                                                                                                                                                                              |                |
|----------------|----------------------------------------------------------------------------------------------------------------------------------------------------------------------------------------------------------------------------------------------------------------------------------------------------------------------------------------------------------------------------------------------------------------------------------------------------------------------------------------------------------------------------------------------------------------------------------------------------------------------------------------------|----------------|
| No.            | Syntax                                                                                                                                                                                                                                                                                                                                                                                                                                                                                                                                                                                                                                       | No. of results |
| 1.             | ((TI=COVID-19 OR AB=COVID-19) OR (TI="sars cov 2" OR AB="sars cov 2") OR (TI="covid 19 vaccines" OR AB="covid 19 vaccines") OR ALL="covid 19 vaccines" OR (TI="covid 19 vaccine*" OR AB="covid 19 vaccine*") OR (TI="sars cov 2 vaccine*" OR AB="sars cov 2 vaccine*") OR (TI="sars cov 2 vaccine*" OR AB="sars cov 2 vaccine*") OR (TI="vaccines sars cov 2" OR AB="vaccines sars cov 2"))                                                                                                                                                                                                                                                  | 85,018         |
| 2.             | (ALL=Seizures OR (TI=seizure* OR AB=seizure*) OR (TI="single seizure*" OR AB="single seizure*") OR (TI="seizure single" OR AB="seizure single") OR (TI="seizures somatosensory" OR AB="seizures somatosensory") OR (TI="visual seizure*" OR AB="visual seizure*") OR (TI="nonepileptic seizure*" OR AB="nonepileptic seizure*") OR (TI="absence seizures generalized" OR AB="absence seizures generalized") OR (TI="tonic clonic seizure*" OR AB="tonic clonic seizure*") OR (TI="myoclonic seizure*" OR AB="myoclonic seizure*") OR (TI="epileptic seizure*" OR AB="epileptic seizure*") OR (TI="seizure absence" OR AB="seizure absence")) | 7,560          |
| 3.             | #1 AND #2                                                                                                                                                                                                                                                                                                                                                                                                                                                                                                                                                                                                                                    | 748            |

| Scopus |                                                                                                                                                                                                                                                                                                                                                                                                                                                                                                                                                                                                                                                                                                                                                                                                                                                                                                                                                                                                                                                                                                                                                                                                                                                                                                                                                                                                                                                                                                                                                                                                                                                                                                                                                                                                                                                                                                                                                                                                                                                                                                                                                                                                                                                                                                                                                                                                                                                                                                                                                                                                                                                                                                                                                                                                                                                                                                                                                                                                                                                               |                |
|--------|---------------------------------------------------------------------------------------------------------------------------------------------------------------------------------------------------------------------------------------------------------------------------------------------------------------------------------------------------------------------------------------------------------------------------------------------------------------------------------------------------------------------------------------------------------------------------------------------------------------------------------------------------------------------------------------------------------------------------------------------------------------------------------------------------------------------------------------------------------------------------------------------------------------------------------------------------------------------------------------------------------------------------------------------------------------------------------------------------------------------------------------------------------------------------------------------------------------------------------------------------------------------------------------------------------------------------------------------------------------------------------------------------------------------------------------------------------------------------------------------------------------------------------------------------------------------------------------------------------------------------------------------------------------------------------------------------------------------------------------------------------------------------------------------------------------------------------------------------------------------------------------------------------------------------------------------------------------------------------------------------------------------------------------------------------------------------------------------------------------------------------------------------------------------------------------------------------------------------------------------------------------------------------------------------------------------------------------------------------------------------------------------------------------------------------------------------------------------------------------------------------------------------------------------------------------------------------------------------------------------------------------------------------------------------------------------------------------------------------------------------------------------------------------------------------------------------------------------------------------------------------------------------------------------------------------------------------------------------------------------------------------------------------------------------------------|----------------|
| No.    | Syntax                                                                                                                                                                                                                                                                                                                                                                                                                                                                                                                                                                                                                                                                                                                                                                                                                                                                                                                                                                                                                                                                                                                                                                                                                                                                                                                                                                                                                                                                                                                                                                                                                                                                                                                                                                                                                                                                                                                                                                                                                                                                                                                                                                                                                                                                                                                                                                                                                                                                                                                                                                                                                                                                                                                                                                                                                                                                                                                                                                                                                                                        | No. of results |
| 1.     | (TITLE-ABS(COVID-19) OR TITLE-ABS("sars cov 2") OR TITLE-ABS("covid 19 vaccines") OR INDEXTERMS("covid 19 vaccines") OR TITLE-ABS("covid 19 vaccine*") OR TITLE-ABS("sars cov 2 vaccine*") OR TITLE-ABS("sars cov 2 vaccine*") OR TITLE-ABS("vaccines sars cov 2"))                                                                                                                                                                                                                                                                                                                                                                                                                                                                                                                                                                                                                                                                                                                                                                                                                                                                                                                                                                                                                                                                                                                                                                                                                                                                                                                                                                                                                                                                                                                                                                                                                                                                                                                                                                                                                                                                                                                                                                                                                                                                                                                                                                                                                                                                                                                                                                                                                                                                                                                                                                                                                                                                                                                                                                                           | 396,247        |
| 2.     | INDEXTERMS(Seizures) OR TITLE-ABS(seizure*) OR TITLE-ABS("single seizure*") OR TITLE-ABS("seizure single") OR TITLE-ABS("seizures somatosensory") OR TITLE-ABS("seizure somatosensory") OR TITLE-ABS("somatosensory seizure*") OR TITLE-ABS("vertiginous seizure*") OR TITLE-ABS("seizures vestibular") OR TITLE-ABS("vestibular seizure*") OR TITLE-ABS("seizures visual") OR TITLE-ABS("seizure visual") OR TITLE-ABS("visual seizure*") OR TITLE-ABS("nonepileptic seizure*") OR TITLE-ABS("seizures nonepileptic") OR TITLE-ABS("non epileptic seizure*") OR TITLE-ABS("non epileptic seizure*") OR TITLE-ABS("seizure non epileptic") OR TITLE-ABS("generalized absence seizure*") OR TITLE-ABS("absence seizures generalized") OR TITLE-ABS("tonic clonic seizure*") OR TITLE-ABS("seizure tonic clonic") OR TITLE-ABS("Tonic Clonic Seizure") OR TITLE-ABS("clonic seizures tonic") OR TITLE-ABS("seizure tonic clonic") OR TITLE-ABS("Tonic Clonic Seizures") OR TITLE-ABS("seizures tonic clonic") OR TITLE-ABS("generalized tonic clonic seizure*") OR TITLE-ABS("generalized tonic clonic seizure*") OR TITLE-ABS("seizure generalized tonic clonic") OR TITLE-ABS("seizures generalized tonic clonic") OR TITLE-ABS("tonic clonic seizures generalized") OR TITLE-ABS("clonic seizure*") OR TITLE-ABS("seizure clonic") OR TITLE-ABS("seizures clonic") OR TITLE-ABS("tonic seizure*") OR TITLE-ABS("seizure tonic") OR TITLE-ABS("seizures tonic") OR TITLE-ABS("convulsions non epileptic") OR TITLE-ABS("non epileptic convulsion*") OR TITLE-ABS(convulsion*) OR TITLE-ABS("atonic absence seizure*") OR TITLE-ABS("absence seizure atonic") OR TITLE-ABS("absence seizures atonic") OR TITLE-ABS("seizure convulsive*") OR TITLE-ABS("convulsive seizure*") OR TITLE-ABS("seizures convulsive") OR TITLE-ABS("seizures motor") OR TITLE-ABS("motor seizure*") OR TITLE-ABS("seizure motor") OR TITLE-ABS("jacksonian seizure*") OR TITLE-ABS("seizure jacksonian") OR TITLE-ABS("seizures auditory") OR TITLE-ABS("auditory seizure*") OR TITLE-ABS("seizure auditory") OR TITLE-ABS("seizures focal") OR TITLE-ABS("focal seizure*") OR TITLE-ABS("seizure focal") OR TITLE-ABS("partial seizure*") OR TITLE-ABS("seizure partial") OR TITLE-ABS("seizures generalized") OR TITLE-ABS("generalized seizure*") OR TITLE-ABS("seizure generalized") OR TITLE-ABS("gustatory seizure*") OR TITLE-ABS("seizures olfactory") OR TITLE-ABS("olfactory seizure*") OR TITLE-ABS("myoclonic seizure*") OR TITLE-ABS("seizure myoclonic") OR TITLE-ABS("epileptic seizure*") OR TITLE-ABS("seizure epileptic") OR TITLE-ABS("seizures epileptic") OR TITLE-ABS("seizures sensory") OR TITLE-ABS("seizure sensory") OR TITLE-ABS("sensory seizure*") OR TITLE-ABS("absence seizure*") OR TITLE-ABS("seizure absence") OR TITLE-ABS("complex partial seizure*") OR TITLE-ABS("partial seizure complex") OR TITLE-ABS("partial seizures complex") OR TITLE-ABS("seizure complex partial") OR TITLE-ABS("atonic seizure*") OR TITLE-ABS("seizure atonic") | 257,003        |
| 3.     | #1 AND #2                                                                                                                                                                                                                                                                                                                                                                                                                                                                                                                                                                                                                                                                                                                                                                                                                                                                                                                                                                                                                                                                                                                                                                                                                                                                                                                                                                                                                                                                                                                                                                                                                                                                                                                                                                                                                                                                                                                                                                                                                                                                                                                                                                                                                                                                                                                                                                                                                                                                                                                                                                                                                                                                                                                                                                                                                                                                                                                                                                                                                                                     | 1,742          |

| Cochrane |                                                                                                                                                                                                                                                                                                                                                                                                                                                                                                                                                                                                                                                                                                                                                                                                                                                                                                                                                                                                                                                                                                                                                                                                                                                                                                                                                                                                                                                                                                                                                                                                                                                                                                                                                                                                                                                                                                                                                                                                                                                                                                                                                                                                                                                                                                                                                                                                                                                                                                                                                                                                                                                                                                                                                                                                                                                                   |                |
|----------|-------------------------------------------------------------------------------------------------------------------------------------------------------------------------------------------------------------------------------------------------------------------------------------------------------------------------------------------------------------------------------------------------------------------------------------------------------------------------------------------------------------------------------------------------------------------------------------------------------------------------------------------------------------------------------------------------------------------------------------------------------------------------------------------------------------------------------------------------------------------------------------------------------------------------------------------------------------------------------------------------------------------------------------------------------------------------------------------------------------------------------------------------------------------------------------------------------------------------------------------------------------------------------------------------------------------------------------------------------------------------------------------------------------------------------------------------------------------------------------------------------------------------------------------------------------------------------------------------------------------------------------------------------------------------------------------------------------------------------------------------------------------------------------------------------------------------------------------------------------------------------------------------------------------------------------------------------------------------------------------------------------------------------------------------------------------------------------------------------------------------------------------------------------------------------------------------------------------------------------------------------------------------------------------------------------------------------------------------------------------------------------------------------------------------------------------------------------------------------------------------------------------------------------------------------------------------------------------------------------------------------------------------------------------------------------------------------------------------------------------------------------------------------------------------------------------------------------------------------------------|----------------|
| No.      | Syntax                                                                                                                                                                                                                                                                                                                                                                                                                                                                                                                                                                                                                                                                                                                                                                                                                                                                                                                                                                                                                                                                                                                                                                                                                                                                                                                                                                                                                                                                                                                                                                                                                                                                                                                                                                                                                                                                                                                                                                                                                                                                                                                                                                                                                                                                                                                                                                                                                                                                                                                                                                                                                                                                                                                                                                                                                                                            | No. of results |
| 1.       | (COVID-19:ti,ab OR "sars cov 2":ti,ab OR "covid 19 vaccines":ti,ab OR [mh "covid 19 vaccines"] OR ("covid 19 NEXT vaccine*"):ti,ab OR ("sars cov 2" NEXT vaccine*):ti,ab OR ("sars cov 2" NEXT vaccine*):ti,ab OR "vaccines sars cov 2":ti,ab)                                                                                                                                                                                                                                                                                                                                                                                                                                                                                                                                                                                                                                                                                                                                                                                                                                                                                                                                                                                                                                                                                                                                                                                                                                                                                                                                                                                                                                                                                                                                                                                                                                                                                                                                                                                                                                                                                                                                                                                                                                                                                                                                                                                                                                                                                                                                                                                                                                                                                                                                                                                                                    | 13,121         |
| 2.       | [mh Seizures] OR seizure*:ti,ab OR ("single" NEXT seizure*):ti,ab OR "seizure single":ti,ab OR "seizures somatosensory":ti,ab OR "seizure somatosensory":ti,ab OR ("somatosensory" NEXT seizure*):ti,ab OR ("vertiginous" NEXT seizure*):ti,ab OR "seizures vestibular":ti,ab OR ("vestibular" NEXT seizure*):ti,ab OR "seizures visual":ti,ab OR "seizure visual":ti,ab OR ("visual" NEXT seizure*):ti,ab OR ("nonepileptic" NEXT seizure*):ti,ab OR "seizures nonepileptic":ti,ab OR ("non epileptic" NEXT seizure*):ti,ab OR ("non epileptic" NEXT seizure*):ti,ab OR "seizure non epileptic":ti,ab OR ("generalized absence" NEXT seizure*):ti,ab OR "absence seizures generalized":ti,ab OR ("tonic clonic" NEXT seizure*):ti,ab OR "seizure tonic clonic":ti,ab OR "Tonic Clonic Seizure":ti,ab OR "clonic seizures tonic":ti,ab OR "seizure tonic clonic":ti,ab OR "Tonic Clonic Seizures":ti,ab OR "seizures tonic clonic":ti,ab OR ("generalized tonic clonic" NEXT seizure*):ti,ab OR ("generalized tonic clonic" NEXT seizure*):ti,ab OR "seizure generalized tonic clonic":ti,ab OR "seizures generalized tonic clonic":ti,ab OR "tonic clonic seizures generalized":ti,ab OR ("clonic" NEXT seizure*):ti,ab OR "seizure clonic":ti,ab OR "seizures clonic":ti,ab OR ("tonic" NEXT seizure*):ti,ab OR "seizure tonic":ti,ab OR "seizures tonic":ti,ab OR "convulsions non epileptic":ti,ab OR ("non epileptic" NEXT convulsion*):ti,ab OR convulsion*:ti,ab OR ("atonic absence" NEXT seizure*):ti,ab OR "absence seizure atonic":ti,ab OR "absence seizures atonic":ti,ab OR ("seizure" NEXT convulsive*):ti,ab OR ("convulsive" NEXT seizure*):ti,ab OR "seizures convulsive":ti,ab OR "seizures motor":ti,ab OR ("motor" NEXT seizure*):ti,ab OR "seizure motor":ti,ab OR ("jacksonian" NEXT seizure*):ti,ab OR "seizure jacksonian":ti,ab OR "seizures auditory":ti,ab OR ("auditory" NEXT seizure*):ti,ab OR "seizure auditory":ti,ab OR "seizures focal":ti,ab OR ("focal" NEXT seizure*):ti,ab OR "seizure focal":ti,ab OR ("partial" NEXT seizure*):ti,ab OR "seizure partial":ti,ab OR "seizures generalized":ti,ab OR ("generalized" NEXT seizure*):ti,ab OR "seizure generalized":ti,ab OR ("gustatory" NEXT seizure*):ti,ab OR "seizures olfactory":ti,ab OR ("olfactory" NEXT seizure*):ti,ab OR ("myoclonic" NEXT seizure*):ti,ab OR "seizure myoclonic":ti,ab OR ("epileptic" NEXT seizure*):ti,ab OR "seizure epileptic":ti,ab OR "seizures epileptic":ti,ab OR "seizures sensory":ti,ab OR "seizure sensory":ti,ab OR ("sensory" NEXT seizure*):ti,ab OR ("absence" NEXT seizure*):ti,ab OR "seizure absence":ti,ab OR ("complex partial" NEXT seizure*):ti,ab OR "partial seizure complex":ti,ab OR "partial seizures complex":ti,ab OR "seizure complex partial":ti,ab OR ("atonic" NEXT seizure*):ti,ab OR "seizure atonic":ti,ab | 9,428          |
| 3.       | #1 AND #2                                                                                                                                                                                                                                                                                                                                                                                                                                                                                                                                                                                                                                                                                                                                                                                                                                                                                                                                                                                                                                                                                                                                                                                                                                                                                                                                                                                                                                                                                                                                                                                                                                                                                                                                                                                                                                                                                                                                                                                                                                                                                                                                                                                                                                                                                                                                                                                                                                                                                                                                                                                                                                                                                                                                                                                                                                                         | 26             |

**Table S2- Quality assessment of the cohorts using the Newcastle-Ottawa scale (NOS) modified for cohort studies.**

| Study                     | Selection (Maximum 4 stars)              |                                    |                           |                                                                          | Comparability (Maximum 2 stars) | Outcome (Maximum 3 stars)                                       |                       |                                                 | Total scores |
|---------------------------|------------------------------------------|------------------------------------|---------------------------|--------------------------------------------------------------------------|---------------------------------|-----------------------------------------------------------------|-----------------------|-------------------------------------------------|--------------|
|                           | Representativeness of the exposed cohort | Selection of the nonexposed cohort | Ascertainment of exposure | Demonstration that outcome of interest was not present at start of study |                                 | Comparability of cohorts on the basis of the design or analysis | Assessment of outcome | Was follow-up long enough for outcomes to occur |              |
| Romozzi et al.            | *                                        | *                                  | *                         |                                                                          | *                               | *                                                               | *                     | *                                               | 7            |
| Martinez-Fernandez et al. | *                                        |                                    | *                         | *                                                                        |                                 | *                                                               | *                     | *                                               | 6            |
| Núñez et al.              | *                                        |                                    | *                         | *                                                                        |                                 | *                                                               | *                     | *                                               | 6            |
| Fang et al.               | *                                        |                                    | *                         | *                                                                        |                                 |                                                                 | *                     | *                                               | 6            |
| Yang et al.               | *                                        | *                                  |                           | *                                                                        | *                               |                                                                 | *                     | *                                               | 6            |
| Lu Q et al.               | *                                        |                                    | *                         | *                                                                        |                                 | *                                                               | *                     | *                                               | 6            |
| Huang et al.              | *                                        |                                    | *                         | *                                                                        |                                 | *                                                               | *                     | *                                               | 6            |
| Pang et al.               | *                                        |                                    | *                         | *                                                                        |                                 | *                                                               | *                     | *                                               | 6            |
| Wang et al.               | *                                        | *                                  | *                         | *                                                                        | **                              | *                                                               | *                     | *                                               | 9            |

**Table S3- Quality assessment of the cross-sectional studies using the Newcastle-Ottawa scale (NOS) modified for cross-sectional studies.**

| Study            | Selection: (Maximum 5 stars)     |             |                 |                                              | Comparability: (Maximum 2 stars)                                                                                                   | Outcome: (Maximum 3 stars) |                  |              |
|------------------|----------------------------------|-------------|-----------------|----------------------------------------------|------------------------------------------------------------------------------------------------------------------------------------|----------------------------|------------------|--------------|
|                  | Representativeness of the sample | Sample size | Non-respondents | Ascertainment of the exposure (risk factor): | The subjects in different outcome groups are comparable, based on the study design or analysis. Confounding factors are controlled | Assessment of the outcome  | Statistical test | Total scores |
| Li et al.        | *                                | *           |                 | *                                            | **                                                                                                                                 | *                          | *                | 7            |
| Massoud et al.   | *                                | *           |                 | **                                           | **                                                                                                                                 | *                          | *                | 8            |
| Lu L et al.      | *                                | *           |                 | **                                           | **                                                                                                                                 | *                          | *                | 8            |
| von Wrede et al. | *                                | *           |                 | *                                            | **                                                                                                                                 | *                          | *                | 7            |
| Kadali et al.    | *                                | *           |                 | **                                           | **                                                                                                                                 | *                          | *                | 8            |
| Chan et al.      | *                                | *           | *               | **                                           | *                                                                                                                                  | **                         |                  | 8            |
| Özdemir et al.   | *                                | *           | *               | **                                           | **                                                                                                                                 | *                          | *                | 9            |
| Hood et al.      | *                                | *           | *               | *                                            | **                                                                                                                                 | *                          | *                | 8            |
| King et al.      |                                  |             |                 | *                                            | **                                                                                                                                 | *                          |                  | 4            |

**Figure S1- PRISMA flow diagram of the systematic search**

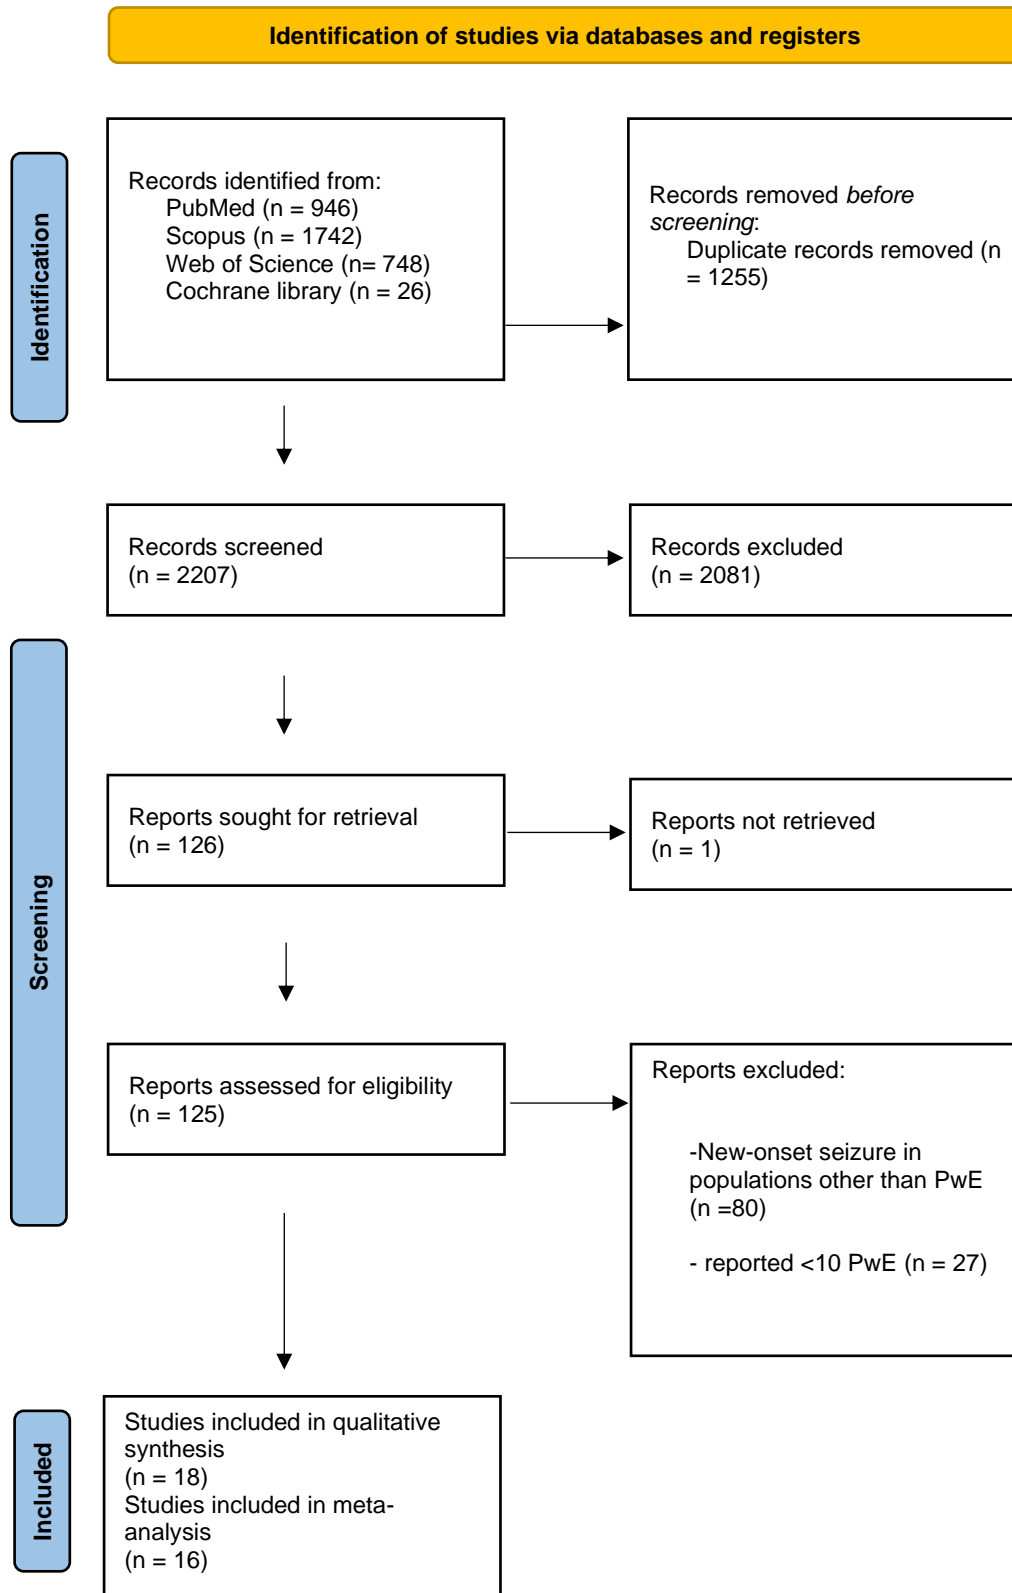

**Figure S2- Funnel plot for studies reporting increased seizure frequency after COVID-19 vaccines.**

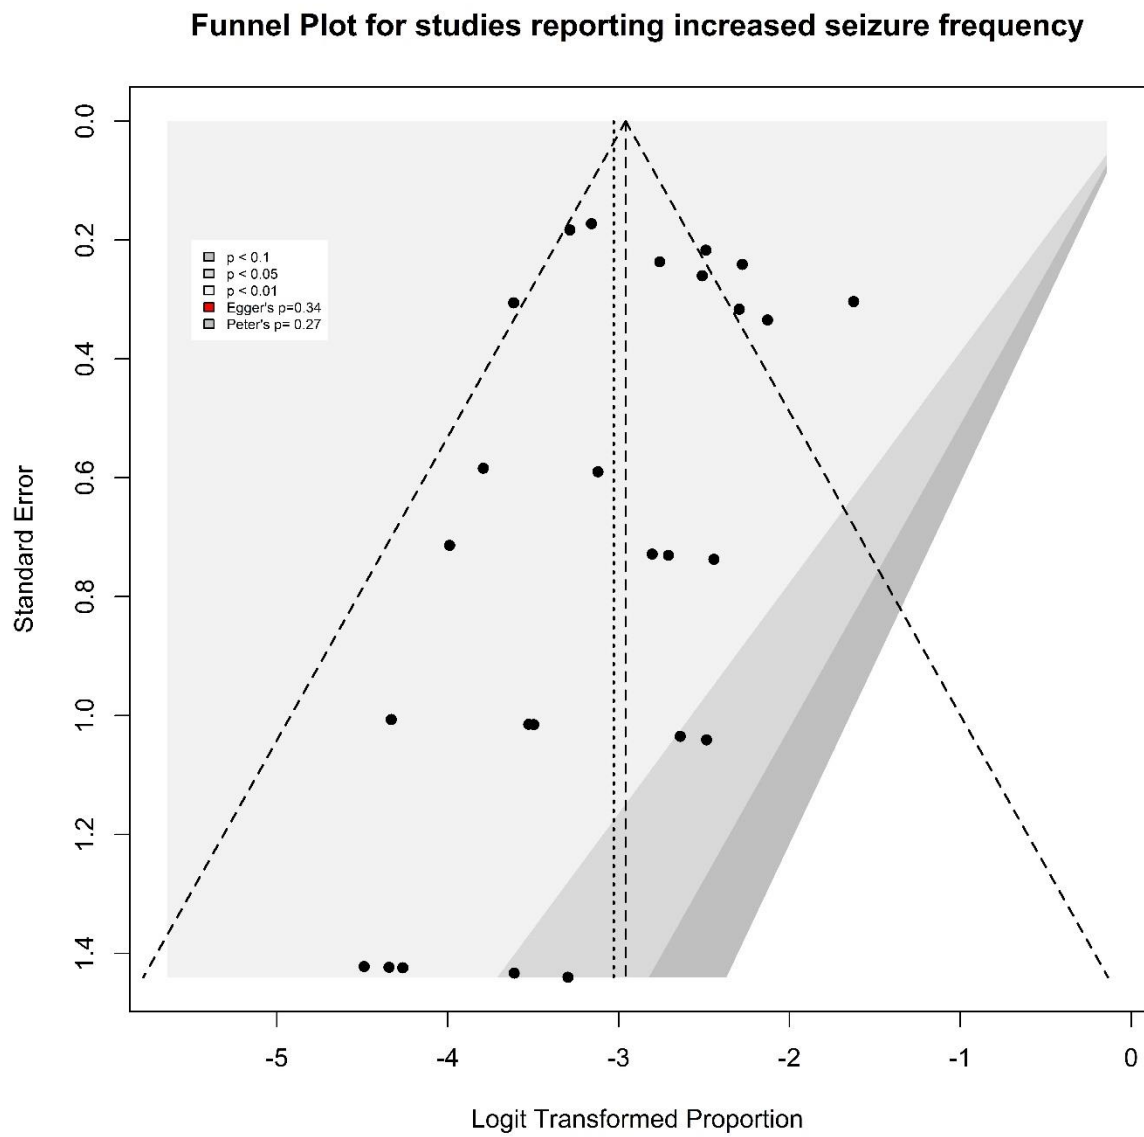



**Figure S3- Funnel plot for studies comparing mRNA vs. viral-vector COVID-19 vaccines regarding increased seizure frequency.**

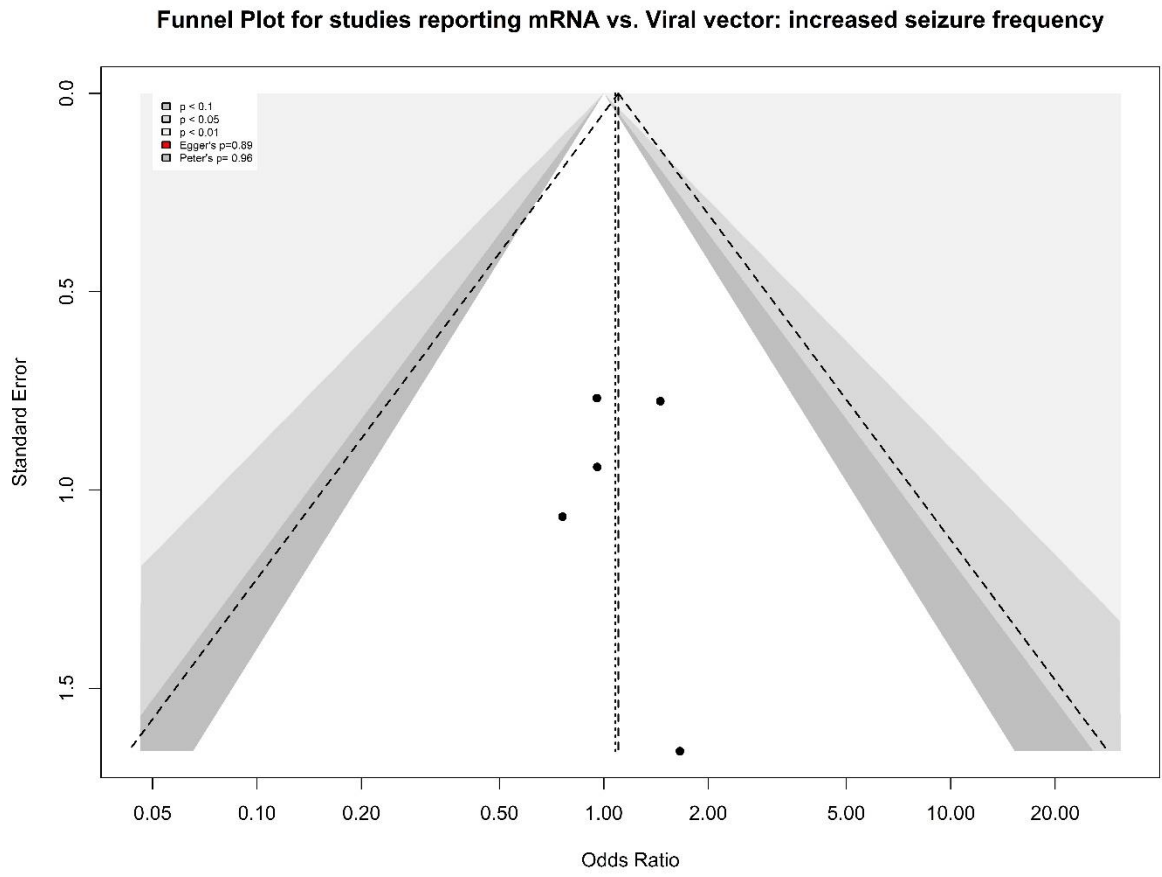

**Figure S4- Funnel plot for studies reporting status epilepticus incidence proportion after COVID-19 vaccines.**

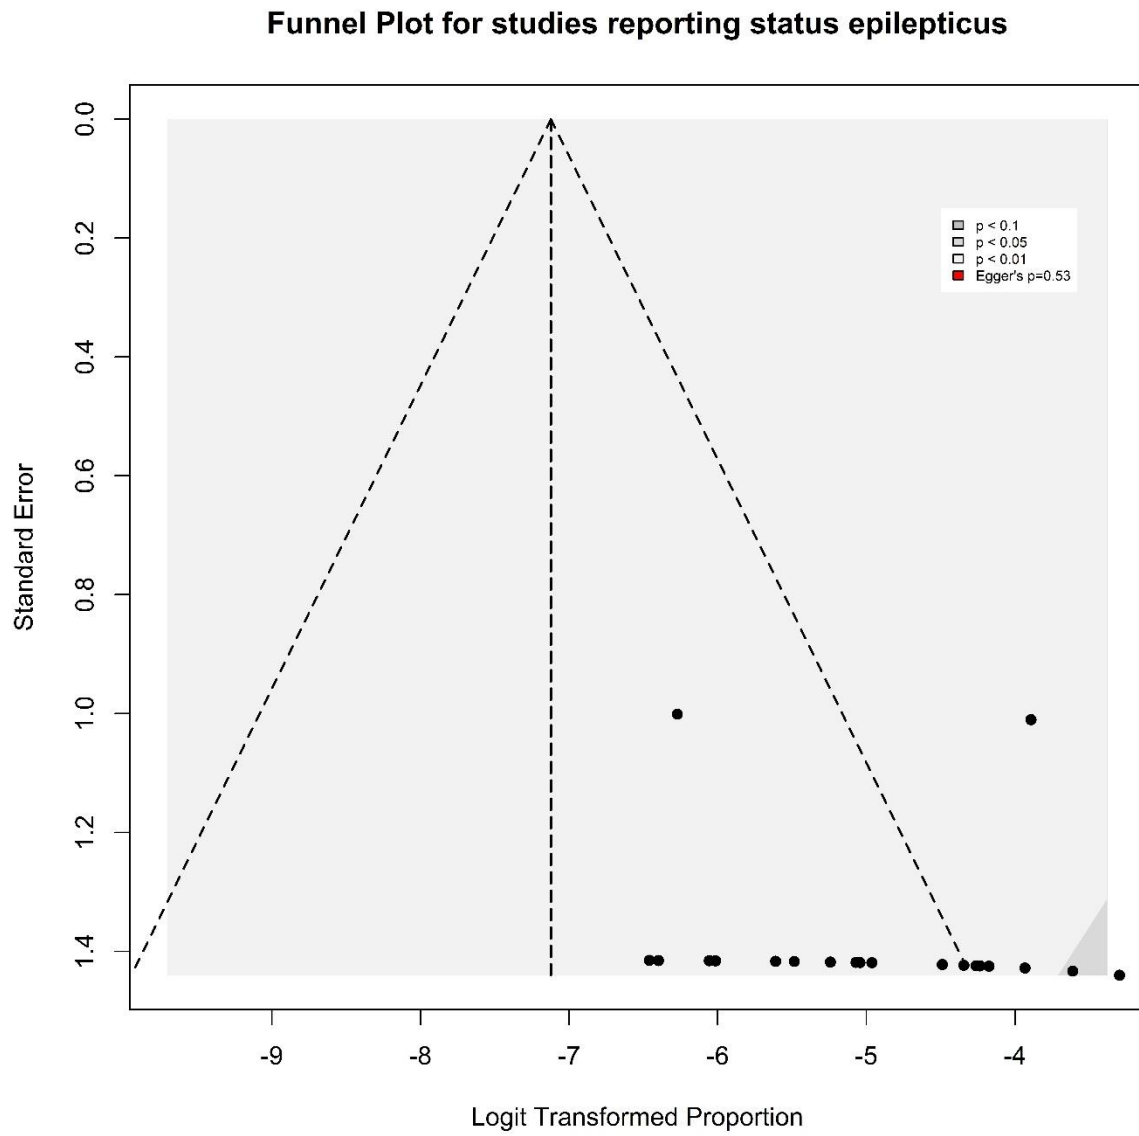

Supplement: Supplementary file [file media-1.pdf]
